# Supplementary material for: RIPK1 regulates survival of human melanoma cells upon endoplasmic reticulum stress through autophagy
Source: PubMed Central journal article supplement — Autophagy. 2015 May 27;11(7):975–94. doi: 10.1080/15548627.2015.1049800 (PMC4590596; doi:10.1080/15548627.2015.1049800), 2015-05-27
Supplement: kaup-11-07-1049800-s001.pdf [file kaup-11-07-1049800-s001.pdf]

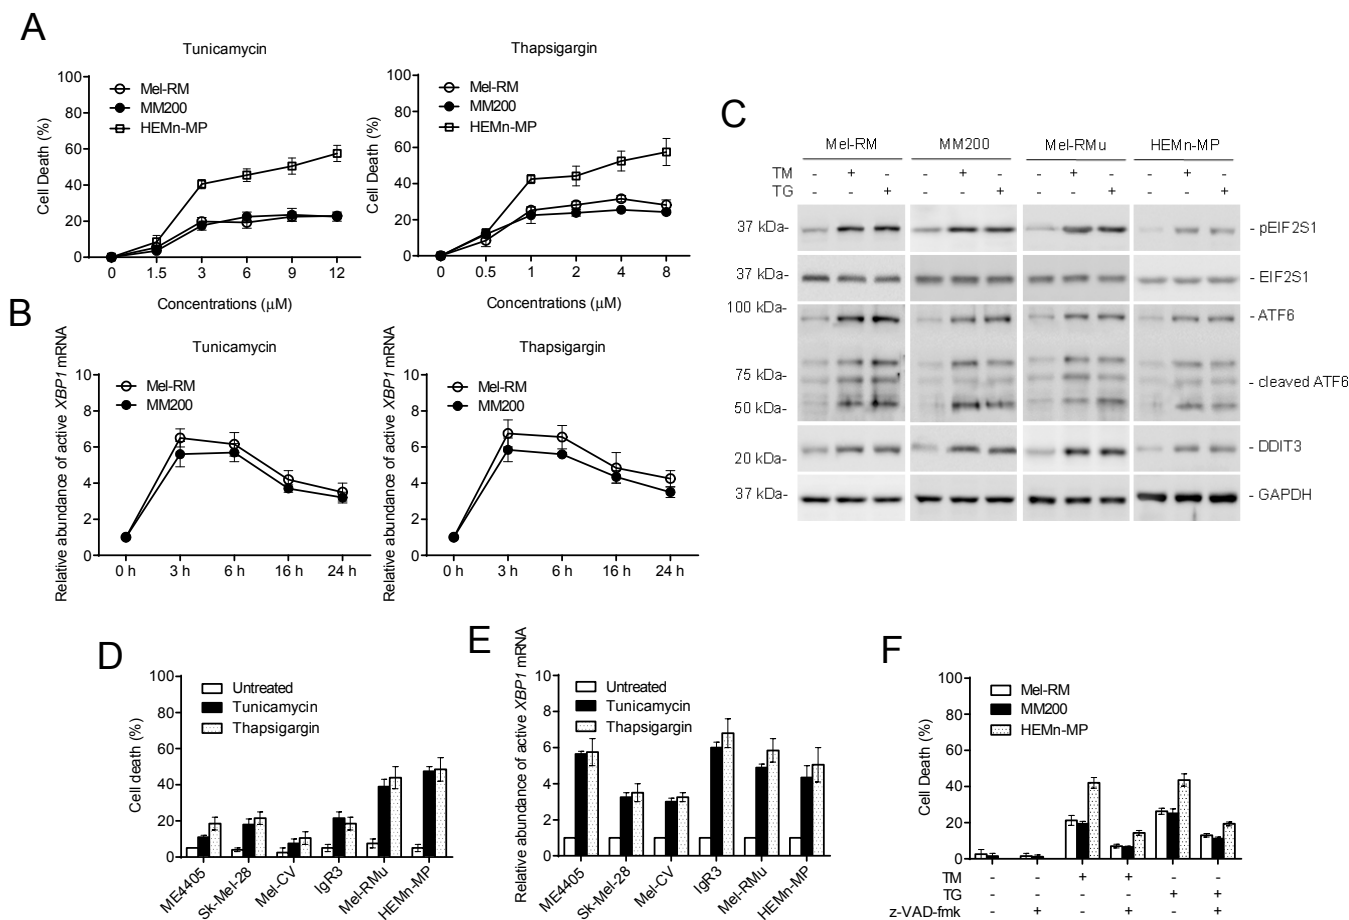

**Figure S1.** Mel-RM and MM200 cells are resistant to ER stress-induced apoptosis. **(A)** Mel-RM and MM200 melanoma cells and HEMn-MP melanocytes were treated with the indicated concentrations of tunicamycin (left panel) or thapsigargin (right panel) for 48 h. Apoptosis was quantitated by the ANXA5/annexin V and FITC-propidium iodide (PI) staining ( $n=3$ , mean  $\pm$  SEM); **(B)** Mel-RM and MM200 cells were treated with tunicamycin (3  $\mu$ M) (left panel) and thapsigargin (1  $\mu$ M) (right panel) for the indicated periods. Total RNA was subjected to qPCR analysis of the expression of active *XBPI* mRNA. The relative abundance of the active *XBPI* mRNA before treatment was arbitrarily designated as 1 ( $n=3$ , mean  $\pm$  SEM); **(C)** Whole cell lysates from Mel-RM, MM200 and Mel-RMu melanoma cells and HEMn-MP melanocytes with or without treatment with tunicamycin (TM) (3  $\mu$ M) or thapsigargin (TG) (1  $\mu$ M) were subjected to western blot analysis of pEIF2S1, EIF2S1, ATF6, DDIT3 and GAPDH (as a loading control) ( $n=3$ ); **(D)** ME4405, Sk-Mel-28, Mel-CV, IGR3, and Mel-RMu melanoma cells and HEMn-MP melanocytes were treated with tunicamycin (3  $\mu$ M) or thapsigargin (1  $\mu$ M) for 48 h. Apoptosis was measured by the ANXA5 and FITC-PI staining ( $n=3$ , mean  $\pm$  SEM); **(E)** ME4405, Sk-Mel-28, Mel-CV, IGR3, and Mel-RMu melanoma cells and HEMn-MP melanocytes were treated with tunicamycin (3  $\mu$ M) or thapsigargin (1  $\mu$ M) for 3 h. Total RNA was subjected to qPCR analysis for the expression of active *XBPI* mRNA. The relative abundance of the active *XBPI* mRNA before treatment was arbitrarily designated as 1 ( $n=3$ , mean  $\pm$  SEM); **(F)** Mel-RM and MM200 melanoma cells and HEMn-MP melanocytes were pre-treated with or without z-VAD-fmk (20  $\mu$ M) followed by treatment with TM (3  $\mu$ M) or TG (1  $\mu$ M) for 48 h. Apoptosis was measured by the ANXA5 and FITC-PI staining ( $n=3$ , mean  $\pm$  SEM).

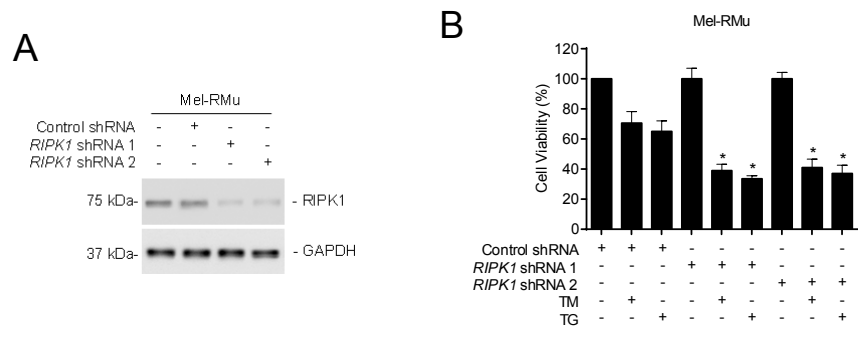

**Figure S2.** RIPK1 protects melanoma cells from killing by pharmacological ER stress. **(A)** Whole cell lysates from Mel-RMu transduced with the control or *RIPK1* shRNA were subjected to western blot analysis of RIPK1 and GAPDH (as a loading control) (n=3); **(B)** Mel-RMu cells transduced with the control or *RIPK1* shRNA were treated with tunicamycin (TM) (3  $\mu$ M) or thapsigargin (TG) (1  $\mu$ M) for 48 h. Cell viability was measured by CellTiter-Glo assays (n=3, mean  $\pm$  SEM, \* $P$ <0.05, Student t test).

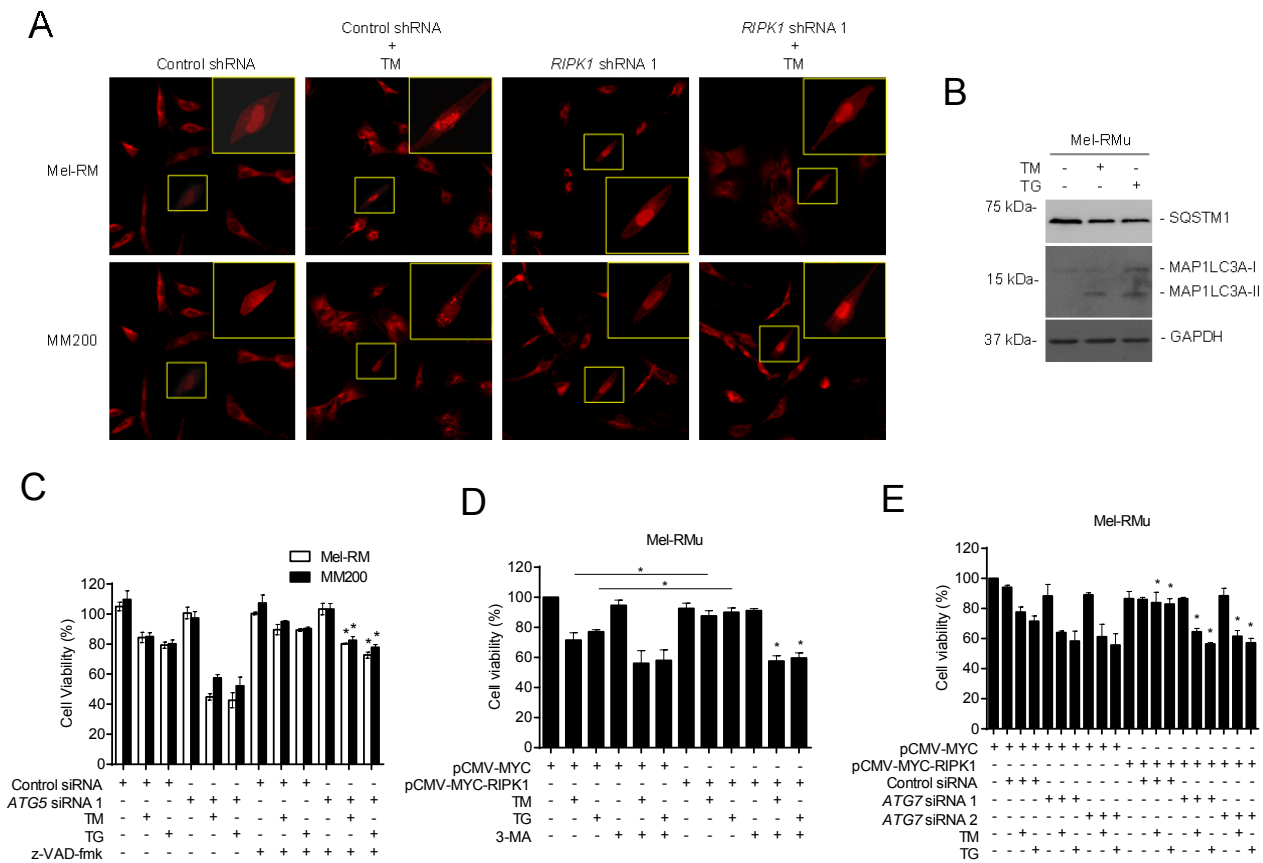

**Figure S3.** RIPK1 protects melanoma cells from ER stress-induced killing by activation of autophagy. (A) Mel-RM and MM200 cells transduced with the control or *RIPK1* shRNA 1 were transiently transfected with a mCherry-hLC3B-pcDNA3.1 construct. Forty-eight h later, cells were exposed to tunicamycin (TM) (3  $\mu$ M) for a further 24 h. A representative cell was enlarged and shown at the top-right or bottom-right corner of each panel. Data shown are representative fluorescence confocal microscopy photographs; (B) Whole cell lysates from Mel-RMu cells with or without treatment with TM (3  $\mu$ M) or thapsigargin (TG) (1  $\mu$ M) for 16 h were subjected to western blot analysis of SQSTM1, MAP1LC3A, and GAPDH (as a loading control) (n=3); (C) Mel-RM and MM200 transfected with the control or *ATG5* siRNA 1 were pretreated with or without z-VAD-fmk (20  $\mu$ M) followed by treatment with TM (3  $\mu$ M) or TG (1  $\mu$ M) for 48 h. Cell viability was measured by CellTiter-Glo assays (n=3, mean  $\pm$  SEM, \* $P$ <0.05, Student t test); (D) Mel-RMu cells stably transfected with the pCMV-MYC or pCMV-MYC-RIPK1 vector with or without pretreatment with 3-methyladenine (3-MA) (5 mM) were treated with TM (3  $\mu$ M) or TG (1  $\mu$ M) for 48 h. Cell viability was measured by CellTiter-Glo (n=3, mean  $\pm$  SEM, \* $P$ <0.05, Student t test); (E) Mel-RMu cells stably transfected with the pCMV-MYC or pCMV-MYC-RIPK1 vector were transfected with the control or *ATG7* siRNA followed by treatment with TM (3  $\mu$ M) or TG (1  $\mu$ M) for 48 h. Cell viability was measured by CellTiter-Glo (n=3, mean  $\pm$  SEM, \* $P$ <0.05, Student t test).

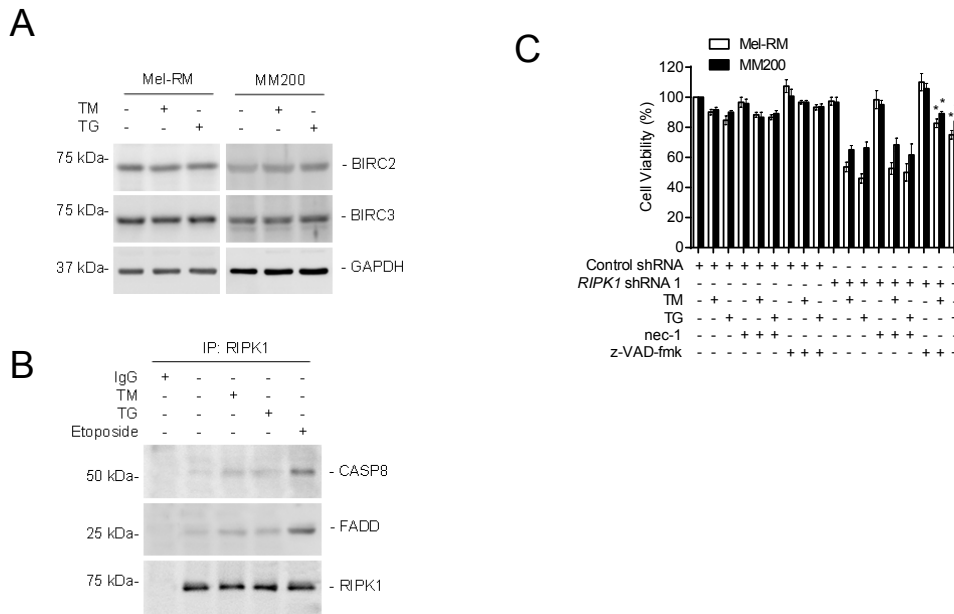

**Figure S4.** RIPK1-mediated activation of MAPK8/9 contributes to induction of autophagy by ER stress in melanoma cells. **(A)** Whole cell lysates from Mel-RM and MM200 cells treated with tunicamycin (TM) (3  $\mu$ M) or thapsigargin (TG) (1  $\mu$ M) for 16 h were subjected to western blot analysis of BIRC2, BIRC3 and GAPDH (as loading control) (n=3); **(B)** Whole cell lysates from Mel-RM cells treated with TM (3  $\mu$ M) or TG (1  $\mu$ M) for 16 h or etoposide (40  $\mu$ M) for one h were immunoprecipitated by RIPK1 antibody. The resulting precipitates were subjected to western blot analysis of CASP8, FADD and RIPK1 (n=3); **(C)** Mel-RM and MM200 cells were pretreated with or without necrostatin-1 (nec-1) (30  $\mu$ M) or z-VAD-fmk (20  $\mu$ M) followed by treatment with TM (3  $\mu$ M) or TG (1  $\mu$ M) for 48 h. Cell viability was measured by CellTiter-Glo (n=3, mean  $\pm$  SEM, \* $P$ <0.05, Student t test).

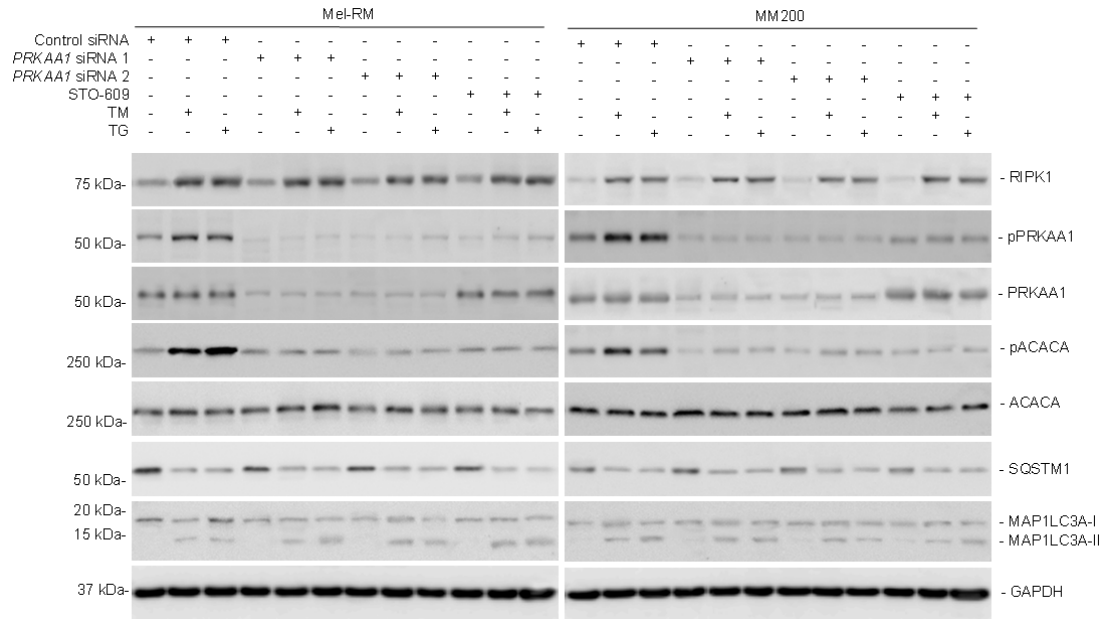

**Figure S5.** The Calcium-CAMKK2-AMPK pathway does not play a major role in pharmacological ER stress upregulation of RIPK1 in melanoma cells. Mel-RM and MM200 cells were transfected with the control or *PRKAA1* siRNA. Whole cell lysates from transfected cells treated with tunicamycin (TM) (3  $\mu$ M) or thapsigargin (TG) (1  $\mu$ M) for 16 h and whole cell lysates from untransfected cells treated with STO-609 (1  $\mu$ g/ml) and TM (3  $\mu$ M) or TG (1  $\mu$ M) were subjected to western blot analysis of RIPK1, pPRKAA1, PRKAA1, pACACA, ACACA, SQSTM1, MAP1LC3A, and GAPDH (as a loading control) (n=3).

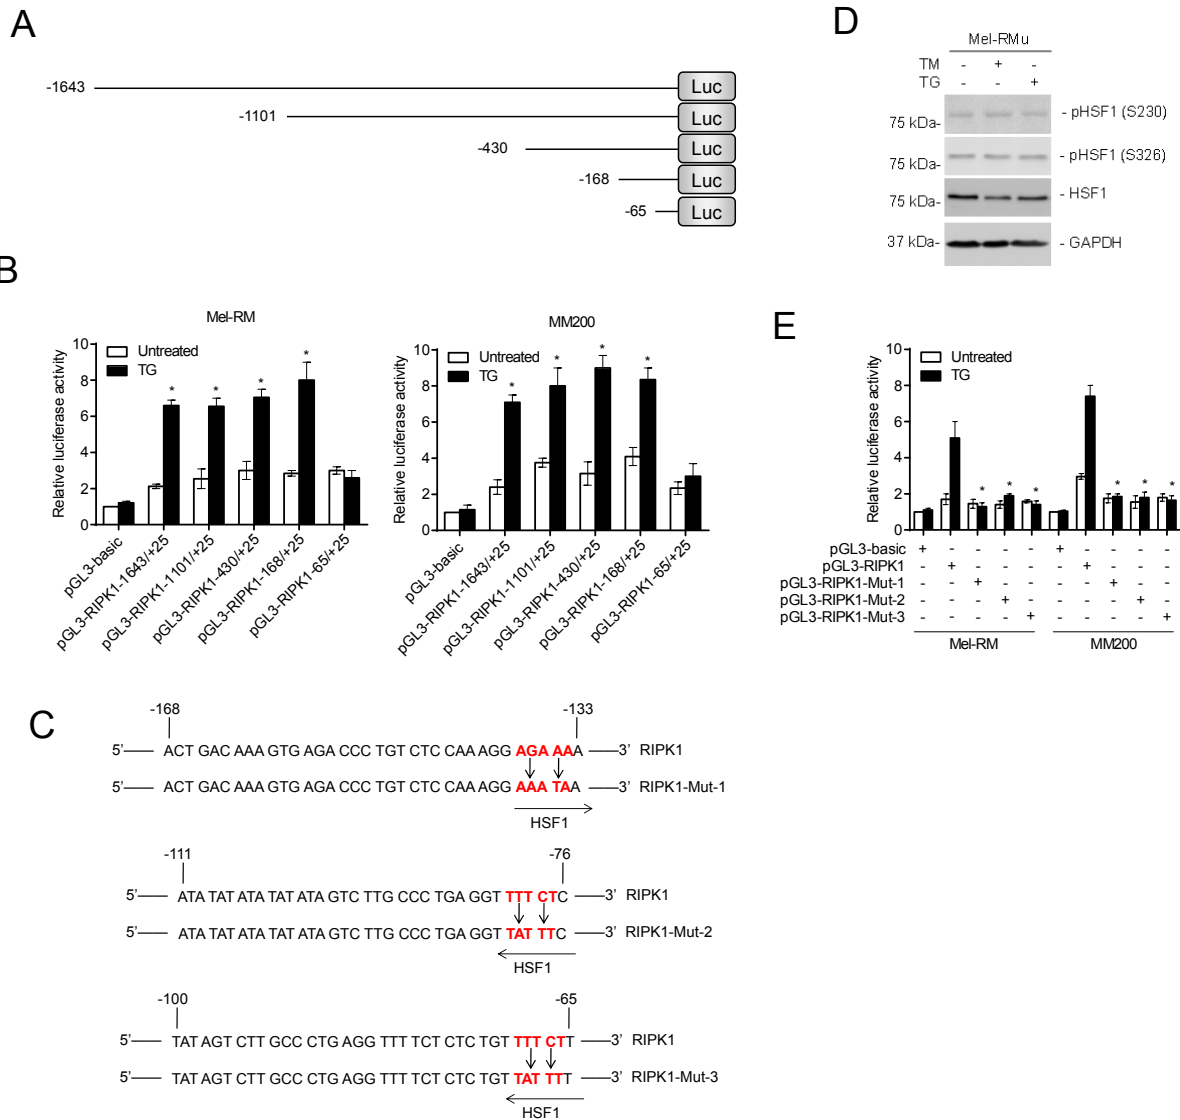

**Figure S6.** HSF1 (heat shock transcription factor 1) is responsible for transcriptional upregulation of *RIPK1* in melanoma cells upon pharmacological ER stress. **(A)** A schematic illustration of construction of the luciferase reporter constructs; **(B)** Mel-RM (left panel) and MM200 (right panel) cells transfected with indicated pGL3-basic based reporter constructs were treated with thapsigargin (TG) (1  $\mu$ M) for 16 h followed by measurement of the luciferase activity (n=3, mean  $\pm$  SEM, \* $P$ <0.05, Student t test); **(C)** A schematic illustration of a potential HSF1 binding motif located within the -168 to -133 region (top panel), the -111 to -76 region (middle panel) and the -100 to -65 region (bottom panel) of the *RIPK1* promoter. Experimental mutagenesis of the region is also depicted; **(D)** Whole cell lysates of Mel-RMu cells treated with tunicamycin (TM) (3  $\mu$ M) or TG (1  $\mu$ M) for 16 h were subjected to western blot analysis of pHSF1 (Ser230), pHSF1 (Ser326), HSF1 and GAPDH (as loading control) (n=3); **(E)** Mel-RM and MM200 cells transfected with indicated pGL3-basic based reporter constructs were treated with TG (1  $\mu$ M) for 16 h followed by measurement of the luciferase activity (n=3, mean  $\pm$  SEM, \* $P$ <0.05, Student t test).

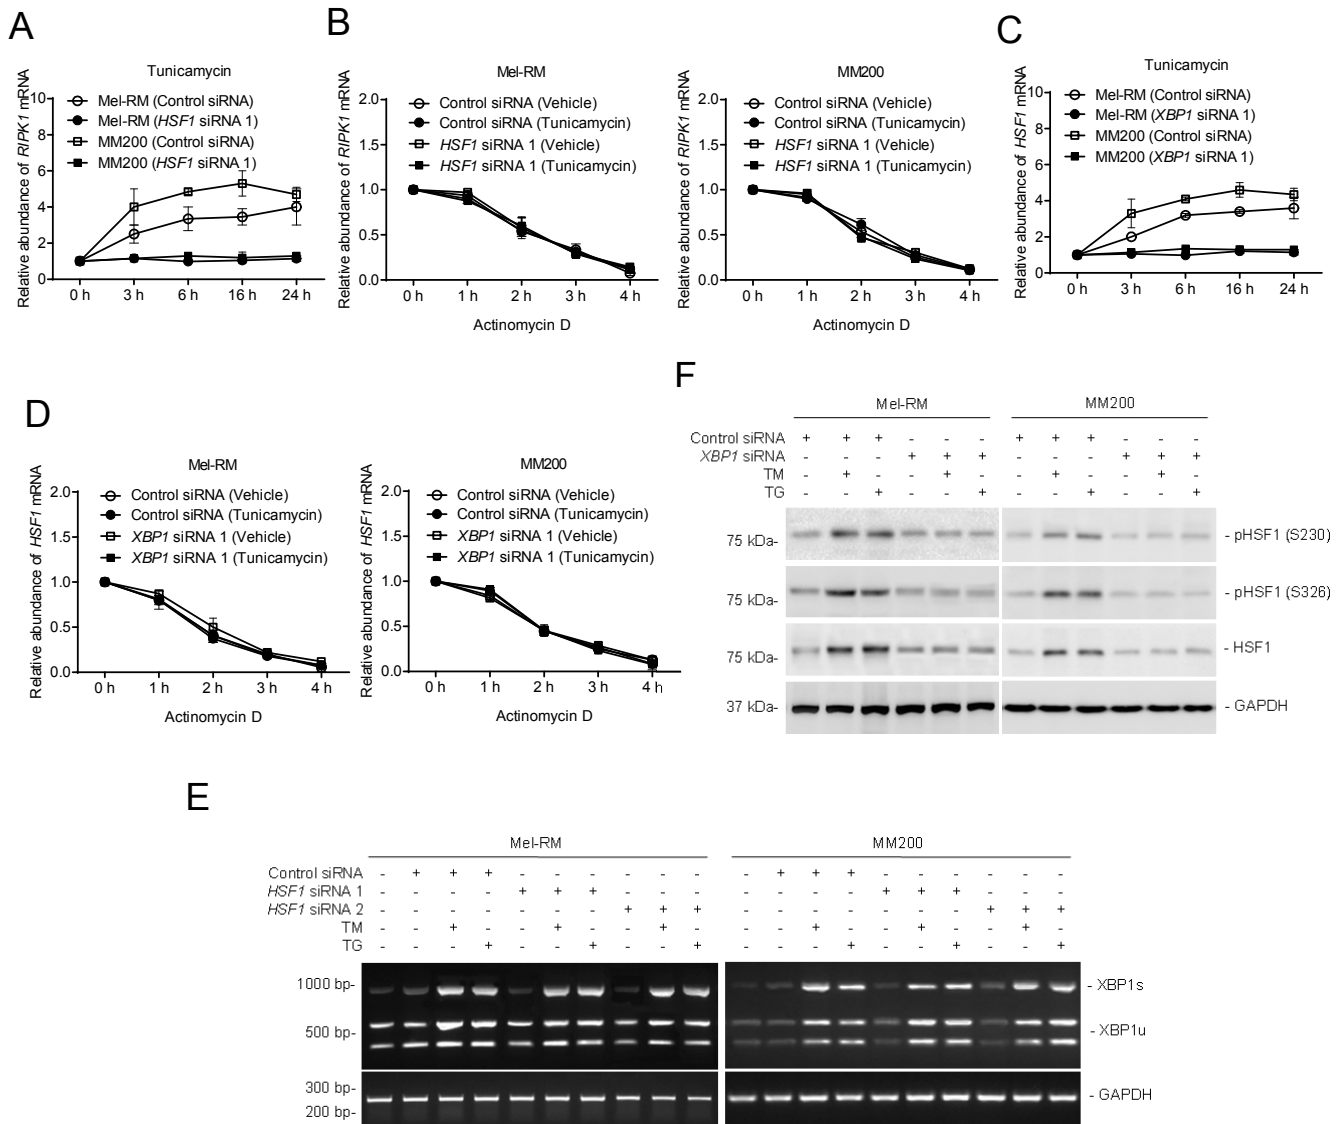

**Figure S7.** Heat shock factor protein 1 (HSF1) is transcriptionally upregulated downstream of XBP1 in melanoma cells under pharmacological ER stress. (**A and C**) Mel-RM and MM200 cells transfected with the control siRNA, *HSF1* siRNA 1 (A), or *XBP1* siRNA 1 (C) were treated with tunicamycin (3  $\mu$ M) for the indicated period. Total RNA was subjected to qPCR analysis of the expression of *RIPK1* (A) or *HSF1* (C) mRNA. The relative abundance of *RIPK1* (A) or *HSF1* (C) mRNA before treatment was arbitrarily designated as 1 (n=3, mean  $\pm$  SEM); (**B and D**) Mel-RM (left panel) and MM200 (right panel) cells transfected with the control siRNA, *HSF1* siRNA 1 (B) or *XBP1* siRNA 1 (D) were treated with tunicamycin (3  $\mu$ M) for 16 h followed by treatment with actinomycin D (100 ng/ml) for the indicated period. Total RNA was subjected to qPCR analysis for the expression of *RIPK1* (B) or *HSF1* (D) mRNA. The relative abundance of the *RIPK1* (B) or *HSF1* (D) mRNA without actinomycin D treatment was arbitrarily designated as 1 (n=3, mean  $\pm$  SEM); (**E**) Mel-RM and MM200 cells transfected with the control or *HSF1* siRNA followed by treatment with tunicamycin (TM) (3  $\mu$ M) or thapsigargin (TG) (1  $\mu$ M) for 16 h were subjected to RT-PCR for the analysis of *XBP1* mRNA. *GAPDH* was used as a loading control (n=3); (**F**) Whole cell lysates from Mel-RM and MM200 transfected with the control or *XBP1* siRNA and treated with tunicamycin (TM) (3  $\mu$ M) or thapsigargin (1  $\mu$ M) were subjected to western blot analysis of pHSF1 (Ser230), pHSF1 (Ser326), HSF1 and GAPDH (as loading control) (n=3).

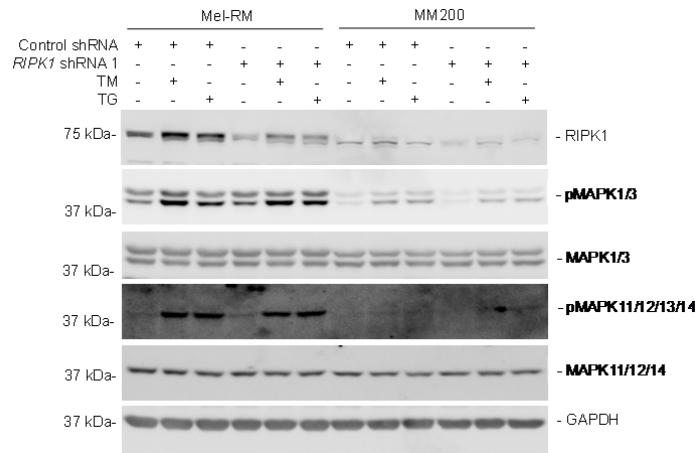

**Figure S8.** Activation of MAPK1/3 and MAPK11/12/13/14 was not affected by RIPK1 knockdown in melanoma cells under ER stress. Mel-RM and MM200 cells stably transduced with the control or *RIPK1* shRNA1 were treated with or without tunicamycin (TM) (3  $\mu$ M) or thapsigargin (TG) (1  $\mu$ M) for 16 h. Whole cell lysates were subjected to western blot analysis of RIPK1, pMAPK1/3, MAPK1/3, pMAPK11/12/13/14, MAPK11/12/14, and GAPDH (as a loading control) (n=3).
